# Supplementary material for: The Stability of Hop (Humulus lupulus L.) Resins during Long-Period Storage
Source: MDPI journal article supplement (doi:10.3390/plants12040936), 2023-02-18
Supplement: s1 [file s1]

Table S1: The content of co-humulone. (n+ad)-humulone and % of co-humulone in alpha-acids in hop cones.

|                    | time | co-humulone |             |             |             | (n+ad)-humulone |             |             |             | % co-humulone in alpha-acids |             |            |            |
|--------------------|------|-------------|-------------|-------------|-------------|-----------------|-------------|-------------|-------------|------------------------------|-------------|------------|------------|
| Variety/Conditions |      | A           | B           | C           | D           | A               | B           | C           | D           | A                            | B           | C          | D          |
| Celeia cones       | 0    | 0.99 ± 0.02 | 0.99 ± 0.02 | 0.99 ± 0.02 | 0.99 ± 0.02 | 2.50 ± 0.04     | 2.50 ± 0.04 | 2.50 ± 0.04 | 2.50 ± 0.04 | 28.3 ± 0.9                   | 28.3 ± 0.9  | 28.3 ± 0.9 | 28.3 ± 0.9 |
|                    | 6    | 0.83 ± 0.01 | 0.80 ± 0.01 | 0.74 ± 0.01 | 0.55 ± 0.01 | 1.99 ± 0.04     | 1.94 ± 0.03 | 1.87 ± 0.03 | 1.4 ± 0.03  | 29.4 ± 0.8                   | 29.3 ± 0.8  | 28.4 ± 0.8 | 28.2 ± 0.7 |
|                    | 12   | 0.79 ± 0.01 | 0.67 ± 0.01 | 0.58 ± 0.01 | 0.3 ± 0.01  | 1.91 ± 0.03     | 1.64 ± 0.03 | 1.47 ± 0.03 | 0.73 ± 0.01 | 29.3 ± 0.8                   | 28.9 ± 0.8  | 28.1 ± 0.7 | 29.3 ± 0.7 |
|                    | 18   | 0.77 ± 0.01 | 0.63 ± 0.01 | 0.52 ± 0.01 | 0.23 ± 0.01 | 1.88 ± 0.03     | 1.54 ± 0.03 | 1.25 ± 0.02 | 0.55 ± 0.01 | 29.1 ± 0.8                   | 28.9 ± 0.8  | 29.4 ± 0.7 | 30.0 ± 0.6 |
|                    | 24   | 0.67 ± 0.01 | 0.50 ± 0.01 | 0.37 ± 0.01 | 0.13 ± 0.01 | 1.65 ± 0.03     | 1.19 ± 0.02 | 0.95 ± 0.02 | 0.30 ± 0.01 | 28.9 ± 0.8                   | 29.4 ± 0.7  | 28.3 ± 0.7 | 30.8 ± 0.6 |
| Auora cones        | 0    | 2.70 ± 0.05 | 2.70 ± 0.05 | 2.70 ± 0.05 | 2.70 ± 0.05 | 9.48 ± 0.17     | 9.48 ± 0.17 | 9.48 ± 0.17 | 9.48 ± 0.17 | 22.2 ± 1.2                   | 22.2 ± 1.2  | 22.2 ± 1.2 | 22.2 ± 1.2 |
|                    | 6    | 2.54 ± 0.04 | 2.43 ± 0.04 | 2.29 ± 0.04 | 2.16 ± 0.04 | 8.98 ± 0.16     | 8.75 ± 0.16 | 8.12 ± 0.15 | 7.50 ± 0.13 | 22.1 ± 1.2                   | 22.0 ± 1.1  | 22.4 ± 1.1 | 22.4 ± 1.1 |
|                    | 12   | 2.43 ± 0.04 | 2.20 ± 0.04 | 2.13 ± 0.04 | 1.39 ± 0.02 | 8.55 ± 0.15     | 7.72 ± 0.14 | 7.44 ± 0.13 | 4.83 ± 0.09 | 22.1 ± 1.1                   | 22.3 ± 1.1  | 22.3 ± 1.1 | 22.6 ± 0.9 |
|                    | 18   | 2.39 ± 0.04 | 2.11 ± 0.04 | 1.95 ± 0.03 | 1.03 ± 0.02 | 8.41 ± 0.15     | 7.47 ± 0.13 | 6.66 ± 0.12 | 3.43 ± 0.06 | 22.1 ± 1.1                   | 22.6 ± 1.1  | 23.1 ± 1.1 | 22.7 ± 0.8 |
|                    | 24   | 2.26 ± 0.04 | 1.79 ± 0.03 | 1.75 ± 0.03 | 0.70 ± 0.01 | 7.88 ± 0.14     | 6.38 ± 0.11 | 6.25 ± 0.11 | 2.35 ± 0.04 | 22.3 ± 1.1                   | 21.9 ± 1.0  | 23.0 ± 1.0 | 22.9 ± 0.7 |
| Bobek cones        | 0    | 0.93 ± 0.02 | 0.93 ± 0.02 | 0.93 ± 0.02 | 0.93 ± 0.02 | 2.55 ± 0.05     | 2.55 ± 0.05 | 2.55 ± 0.05 | 2.55 ± 0.05 | 26.7 ± 0.8                   | 26.7 ± 0.8  | 26.7 ± 0.8 | 26.7 ± 0.8 |
|                    | 6    | 0.89 ± 0.02 | 0.76 ± 0.01 | 0.76 ± 0.01 | 0.75 ± 0.01 | 2.38 ± 0.04     | 2.06 ± 0.04 | 1.93 ± 0.03 | 1.94 ± 0.03 | 27.1 ± 0.8                   | 26.9 ± 0.8  | 28.2 ± 0.8 | 27.8 ± 0.8 |
|                    | 12   | 0.82 ± 0.01 | 0.69 ± 0.01 | 0.64 ± 0.01 | 0.30 ± 0.01 | 2.14 ± 0.04     | 1.84 ± 0.03 | 1.79 ± 0.03 | 0.82 ± 0.01 | 27.7 ± 0.8                   | 27.4 ± 0.8  | 26.4 ± 0.7 | 27.0 ± 0.6 |
|                    | 18   | 0.78 ± 0.01 | 0.64 ± 0.01 | 0.55 ± 0.01 | 0.22 ± 0.01 | 2.02 ± 0.04     | 1.73 ± 0.03 | 1.62 ± 0.03 | 0.55 ± 0.01 | 28.0 ± 0.8                   | 27.1 ± 0.7  | 25.5 ± 0.7 | 28.8 ± 0.6 |
|                    | 24   | 0.74 ± 0.01 | 0.54 ± 0.01 | 0.45 ± 0.01 | 0.15 ± 0.01 | 1.83 ± 0.03     | 1.49 ± 0.03 | 1.20 ± 0.02 | 0.40 ± 0.01 | 28.9 ± 0.8                   | 26.6 ± 0.7  | 27.3 ± 0.7 | 27.3 ± 0.6 |
| Styrian Gold cones | 0    | 1.86 ± 0.03 | 1.86 ± 0.03 | 1.86 ± 0.03 | 1.86 ± 0.03 | 3.60 ± 0.06     | 3.60 ± 0.06 | 3.60 ± 0.06 | 3.60 ± 0.06 | 34.0 ± 1.2                   | 34.0 ± 1.20 | 34.0 ± 1.2 | 34.0 ± 1.2 |
|                    | 6    | 1.47 ± 0.03 | 1.36 ± 0.02 | 1.39 ± 0.02 | 1.22 ± 0.02 | 2.82 ± 0.05     | 2.63 ± 0.05 | 2.70 ± 0.05 | 2.36 ± 0.04 | 34.3 ± 1.1                   | 34.1 ± 1.1  | 33.9 ± 1.1 | 34.0 ± 1.0 |
|                    | 12   | 1.38 ± 0.02 | 1.18 ± 0.02 | 1.27 ± 0.02 | 0.71 ± 0.01 | 2.67 ± 0.05     | 2.27 ± 0.04 | 2.42 ± 0.04 | 1.42 ± 0.03 | 34.1 ± 1.1                   | 34.2 ± 1.0  | 34.3 ± 1.1 | 33.5 ± 0.9 |
|                    | 18   | 1.34 ± 0.02 | 1.13 ± 0.02 | 1.20 ± 0.02 | 0.56 ± 0.01 | 2.62 ± 0.05     | 2.22 ± 0.04 | 2.32 ± 0.04 | 1.10 ± 0.02 | 33.9 ± 1.1                   | 33.8 ± 1.0  | 34.1 ± 1.0 | 33.8 ± 0.8 |
|                    | 24   | 1.20 ± 0.02 | 1.06 ± 0.02 | 0.99 ± 0.02 | 0.39 ± 0.01 | 2.31 ± 0.04     | 2.08 ± 0.04 | 1.96 ± 0.04 | 0.79 ± 0.01 | 34.2 ± 1.0                   | 33.8 ± 1.0  | 33.6 ± 1.0 | 33.0 ± 0.7 |
| Styrian Wolf cones | 0    | 2.69 ± 0.05 | 2.69 ± 0.05 | 2.69 ± 0.05 | 2.69 ± 0.05 | 9.71 ± 0.17     | 9.71 ± 0.17 | 9.71 ± 0.17 | 9.71 ± 0.17 | 21.7 ± 1.2                   | 21.7 ± 1.2  | 21.7 ± 1.2 | 21.7 ± 1.2 |
|                    | 6    | 2.47 ± 0.04 | 2.32 ± 0.04 | 1.92 ± 0.03 | 1.43 ± 0.02 | 8.96 ± 0.16     | 8.16 ± 0.15 | 6.77 ± 0.12 | 5.02 ± 0.09 | 21.6 ± 1.1                   | 22.2 ± 1.1  | 22.1 ± 1.0 | 22.2 ± 0.9 |
|                    | 12   | 2.34 ± 0.04 | 2.13 ± 0.04 | 1.68 ± 0.03 | 0.88 ± 0.02 | 8.35 ± 0.15     | 7.71 ± 0.14 | 5.94 ± 0.11 | 2.96 ± 0.05 | 21.9 ± 1.1                   | 21.7 ± 1.1  | 22.0 ± 1.0 | 22.9 ± 0.8 |
|                    | 18   | 2.23 ± 0.04 | 1.89 ± 0.03 | 1.38 ± 0.02 | 0.58 ± 0.01 | 7.72 ± 0.14     | 6.77 ± 0.12 | 4.90 ± 0.09 | 2.01 ± 0.04 | 22.4 ± 1.1                   | 21.9 ± 1.0  | 22.0 ± 0.9 | 22.3 ± 0.6 |
|                    | 24   | 1.99 ± 0.03 | 1.79 ± 0.03 | 1.04 ± 0.02 | 0.45 ± 0.01 | 7.09 ± 0.13     | 6.32 ± 0.11 | 3.66 ± 0.07 | 1.68 ± 0.03 | 21.9 ± 1.0                   | 22.1 ± 1.0  | 22.2 ± 0.8 | 21.2 ± 0.6 |

Table S2: The content of co-humulone. (n+ad)-humulone and % of co-humulone in alpha-acids in hop pellets.

|                         | time | co-humulone |             |             |             | (n+ad)-humulone |             |             |             | % co-humulone in alpha-acids |            |            |            |
|-------------------------|------|-------------|-------------|-------------|-------------|-----------------|-------------|-------------|-------------|------------------------------|------------|------------|------------|
| Variety/Conditions      |      | A           | B           | C           | D           | A               | B           | C           | D           | A                            | B          | C          | D          |
| Celeia pellets          | 0    | 0.79 ± 0.01 | 0.79 ± 0.01 | 0.79 ± 0.01 | 0.79 ± 0.01 | 2.39 ± 0.04     | 2.39 ± 0.04 | 2.39 ± 0.04 | 2.39 ± 0.04 | 24.8 ± 0.8                   | 24.8 ± 0.8 | 24.9 ± 0.8 | 24.9 ± 0.8 |
|                         | 6    | 0.71 ± 0.01 | 0.69 ± 0.01 | 0.62 ± 0.01 | 0.62 ± 0.01 | 2.00 ± 0.04     | 1.95 ± 0.03 | 1.76 ± 0.03 | 1.76 ± 0.03 | 26.3 ± 0.8                   | 26.1 ± 0.7 | 26.0 ± 0.7 | 26.1 ± 0.7 |
|                         | 12   | 0.70 ± 0.01 | 0.53 ± 0.01 | 0.55 ± 0.01 | 0.30 ± 0.01 | 1.95 ± 0.03     | 1.56 ± 0.03 | 1.54 ± 0.03 | 0.84 ± 0.02 | 26.3 ± 0.8                   | 25.5 ± 0.7 | 26.2 ± 0.7 | 26.2 ± 0.6 |
|                         | 18   | 0.67 ± 0.01 | 0.51 ± 0.01 | 0.51 ± 0.01 | 0.24 ± 0.01 | 1.90 ± 0.03     | 1.49 ± 0.03 | 1.47 ± 0.03 | 0.73 ± 0.01 | 26.2 ± 0.7                   | 25.4 ± 0.7 | 25.9 ± 0.7 | 25.0 ± 0.6 |
|                         | 24   | 0.63 ± 0.01 | 0.40 ± 0.01 | 0.35 ± 0.01 | 0.07 ± 0.01 | 1.76 ± 0.03     | 1.15 ± 0.02 | 1.02 ± 0.02 | 0.21 ± 0.01 | 26.5 ± 0.7                   | 25.5 ± 0.6 | 25.5 ± 0.6 | 24.0 ± 0.5 |
| Auora pellets           | 0    | 2.55 ± 0.04 | 2.55 ± 0.04 | 2.55 ± 0.04 | 2.55 ± 0.04 | 8.77 ± 0.16     | 8.77 ± 0.16 | 8.77 ± 0.16 | 8.77 ± 0.16 | 22.5 ± 1.2                   | 22.5 ± 1.2 | 22.5 ± 1.2 | 22.5 ± 1.2 |
|                         | 6    | 2.42 ± 0.04 | 2.22 ± 0.04 | 2.21 ± 0.04 | 2.13 ± 0.04 | 8.41 ± 0.15     | 7.61 ± 0.14 | 7.53 ± 0.13 | 7.31 ± 0.13 | 22.4 ± 1.1                   | 22.6 ± 1.1 | 22.7 ± 1.1 | 22.5 ± 1.1 |
|                         | 12   | 2.35 ± 0.04 | 2.08 ± 0.04 | 2.10 ± 0.04 | 1.67 ± 0.03 | 8.02 ± 0.14     | 7.11 ± 0.13 | 7.22 ± 0.13 | 5.66 ± 0.10 | 22.6 ± 1.1                   | 22.6 ± 1.1 | 22.5 ± 1.1 | 22.8 ± 1.0 |
|                         | 18   | 2.29 ± 0.04 | 2.01 ± 0.03 | 1.94 ± 0.03 | 1.45 ± 0.03 | 7.78 ± 0.14     | 6.99 ± 0.13 | 6.54 ± 0.12 | 4.99 ± 0.09 | 22.7 ± 1.1                   | 22.3 ± 1.0 | 22.9 ± 1.0 | 22.5 ± 0.9 |
|                         | 24   | 2.07 ± 0.04 | 1.86 ± 0.03 | 1.70 ± 0.03 | 0.91 ± 0.02 | 6.98 ± 0.12     | 6.49 ± 0.12 | 5.76 ± 0.10 | 3.22 ± 0.06 | 22.9 ± 1.1                   | 22.3 ± 1.0 | 22.8 ± 1.0 | 22.0 ± 0.8 |
| Bobek pellets           | 0    | 1.43 ± 0.02 | 1.43 ± 0.02 | 1.43 ± 0.02 | 1.43 ± 0.02 | 4.71 ± 0.08     | 4.71 ± 0.08 | 4.71 ± 0.08 | 4.71 ± 0.08 | 22.5 ± 0.9                   | 23.3 ± 0.9 | 23.3 ± 0.9 | 23.3 ± 0.9 |
|                         | 6    | 1.26 ± 0.02 | 1.06 ± 0.02 | 1.08 ± 0.02 | 0.82 ± 0.01 | 4.04 ± 0.07     | 3.48 ± 0.06 | 3.44 ± 0.06 | 2.63 ± 0.05 | 23.7 ± 0.9                   | 23.3 ± 0.8 | 23.9 ± 0.8 | 23.8 ± 0.8 |
|                         | 12   | 1.17 ± 0.02 | 0.95 ± 0.02 | 0.99 ± 0.02 | 0.11 ± 0.01 | 3.8 ± 0.07      | 3.10 ± 0.06 | 3.22 ± 0.06 | 0.45 ± 0.01 | 23.6 ± 0.9                   | 23.4 ± 0.8 | 23.6 ± 0.8 | 19.6 ± 0.4 |
|                         | 18   | 1.15 ± 0.02 | 0.90 ± 0.02 | 0.93 ± 0.02 | 0.05 ± 0.01 | 3.69 ± 0.07     | 2.92 ± 0.05 | 3.05 ± 0.05 | 0.21 ± 0.01 | 23.7 ± 0.9                   | 23.6 ± 0.8 | 23.4 ± 0.8 | 20.8 ± 0.4 |
|                         | 24   | 1.00 ± 0.02 | 0.79 ± 0.01 | 0.85 ± 0.01 | 0.02 ± 0.01 | 3.20 ± 0.06     | 2.62 ± 0.05 | 2.74 ± 0.05 | 0.05 ± 0.01 | 23.8 ± 0.8                   | 23.1 ± 0.7 | 23.7 ± 0.8 | 28.6 ± 0.5 |
| Styrian Golding pellets | 0    | 1.08 ± 0.02 | 1.08 ± 0.02 | 1.08 ± 0.02 | 1.08 ± 0.02 | 2.58 ± 0.05     | 2.58 ± 0.05 | 2.58 ± 0.05 | 2.58 ± 0.05 | 29.5 ± 0.9                   | 29.5 ± 0.9 | 29.5 ± 0.9 | 29.5 ± 0.9 |
|                         | 6    | 0.87 ± 0.02 | 0.77 ± 0.01 | 0.79 ± 0.01 | 0.76 ± 0.01 | 2.10 ± 0.04     | 1.83 ± 0.03 | 1.92 ± 0.03 | 1.83 ± 0.03 | 29.5 ± 0.9                   | 29.6 ± 0.8 | 29.2 ± 0.8 | 29.3 ± 0.8 |
|                         | 12   | 0.83 ± 0.01 | 0.68 ± 0.01 | 0.77 ± 0.01 | 0.54 ± 0.01 | 2.01 ± 0.04     | 1.63 ± 0.03 | 1.83 ± 0.03 | 1.37 ± 0.02 | 29.1 ± 0.8                   | 29.4 ± 0.8 | 29.5 ± 0.8 | 28.1 ± 0.7 |
|                         | 18   | 0.81 ± 0.01 | 0.65 ± 0.01 | 0.73 ± 0.01 | 0.45 ± 0.01 | 1.95 ± 0.03     | 1.58 ± 0.03 | 1.78 ± 0.03 | 1.18 ± 0.02 | 29.4 ± 0.8                   | 29.2 ± 0.8 | 29.1 ± 0.8 | 27.7 ± 0.7 |
|                         | 24   | 0.79 ± 0.01 | 0.54 ± 0.01 | 0.67 ± 0.01 | 0.25 ± 0.01 | 1.80 ± 0.03     | 1.40 ± 0.03 | 1.59 ± 0.03 | 0.72 ± 0.01 | 30.4 ± 0.8                   | 27.8 ± 0.7 | 30.7 ± 0.8 | 26.1 ± 0.6 |
| Styrian Wolf pellets    | 0    | 3.01 ± 0.05 | 3.01 ± 0.05 | 3.01 ± 0.05 | 3.01 ± 0.05 | 10.1 ± 0.18     | 10.1 ± 0.18 | 10.1 ± 0.18 | 10.1 ± 0.18 | 23.0 ± 1.3                   | 23.0 ± 1.3 | 23.0 ± 1.3 | 23.0 ± 1.3 |
|                         | 6    | 2.78 ± 0.05 | 2.61 ± 0.05 | 2.17 ± 0.04 | 1.70 ± 0.03 | 9.44 ± 0.17     | 8.83 ± 0.16 | 7.38 ± 0.13 | 5.74 ± 0.10 | 22.7 ± 1.2                   | 22.8 ± 1.2 | 22.8 ± 1.1 | 22.9 ± 1.0 |
|                         | 12   | 2.74 ± 0.05 | 2.43 ± 0.04 | 1.91 ± 0.03 | 0.87 ± 0.02 | 9.31 ± 0.17     | 8.34 ± 0.15 | 6.44 ± 0.12 | 3.00 ± 0.05 | 22.7 ± 1.2                   | 22.6 ± 1.1 | 22.9 ± 1.0 | 22.4 ± 0.7 |
|                         | 18   | 2.71 ± 0.05 | 2.31 ± 0.04 | 1.54 ± 0.03 | 0.60 ± 0.01 | 9.13 ± 0.16     | 7.89 ± 0.14 | 5.16 ± 0.09 | 2.10 ± 0.04 | 22.9 ± 1.2                   | 22.6 ± 1.1 | 23.0 ± 0.9 | 22.2 ± 0.7 |
|                         | 24   | 2.62 ± 0.05 | 2.09 ± 0.04 | 1.05 ± 0.02 | 0.16 ± 0.01 | 8.94 ± 0.16     | 7.15 ± 0.13 | 3.55 ± 0.06 | 0.56 ± 0.01 | 22.7 ± 1.2                   | 22.6 ± 1.1 | 22.8 ± 0.8 | 22.4 ± 0.5 |

Table S3: The content of co-lupulone, (n+ad)-lupulone and % of co-lupulone in beta-acids in hop cones.

|                    | time | co-lupulone |             |             |             | (n+ad)-lupulone |             |             |             | % co-lupulone in beta-acids |            |            |            |
|--------------------|------|-------------|-------------|-------------|-------------|-----------------|-------------|-------------|-------------|-----------------------------|------------|------------|------------|
| Variety/Conditions |      | A           | B           | C           | D           | A               | B           | C           | D           | A                           | B          | C          | D          |
| Celeia cones       | 0    | 1.88 ± 0.03 | 1.88 ± 0.03 | 1.88 ± 0.03 | 1.88 ± 0.03 | 1.30 ± 0.02     | 1.30 ± 0.02 | 1.30 ± 0.02 | 1.30 ± 0.02 | 59.2 ± 1.4                  | 59.2 ± 1.4 | 59.1 ± 1.4 | 59.2 ± 1.4 |
|                    | 6    | 1.55 ± 0.02 | 1.41 ± 0.02 | 1.33 ± 0.02 | 1.04 ± 0.02 | 1.05 ± 0.02     | 0.98 ± 0.02 | 0.92 ± 0.01 | 0.70 ± 0.01 | 59.6 ± 1.4                  | 58.9 ± 1.3 | 59.1 ± 1.3 | 59.9 ± 1.2 |
|                    | 12   | 1.52 ± 0.02 | 1.25 ± 0.02 | 1.06 ± 0.02 | 0.42 ± 0.01 | 1.00 ± 0.02     | 0.84 ± 0.01 | 0.70 ± 0.01 | 0.29 ± 0.01 | 60.2 ± 1.4                  | 59.8 ± 1.3 | 60.2 ± 1.2 | 59.4 ± 1.0 |
|                    | 18   | 1.44 ± 0.02 | 1.17 ± 0.02 | 0.93 ± 0.01 | 0.32 ± 0.01 | 0.95 ± 0.02     | 0.79 ± 0.01 | 0.62 ± 0.01 | 0.18 ± 0.01 | 60.3 ± 1.4                  | 59.7 ± 1.3 | 60.1 ± 1.2 | 64.4 ± 1.1 |
|                    | 24   | 1.29 ± 0.02 | 0.92 ± 0.01 | 0.66 ± 0.01 | 0.18 ± 0.01 | 0.85 ± 0.01     | 0.61 ± 0.01 | 0.46 ± 0.01 | 0.11 ± 0.01 | 60.3 ± 1.3                  | 60.1 ± 1.2 | 59.0 ± 1.1 | 61.5 ± 1.0 |
| Auora cones        | 0    | 2.53 ± 0.04 | 2.53 ± 0.04 | 2.53 ± 0.04 | 2.53 ± 0.04 | 2.38 ± 0.04     | 2.38 ± 0.04 | 2.38 ± 0.04 | 2.38 ± 0.04 | 51.6 ± 1.5                  | 51.6 ± 1.5 | 51.6 ± 1.5 | 51.6 ± 1.5 |
|                    | 6    | 2.34 ± 0.03 | 2.14 ± 0.03 | 2.10 ± 0.03 | 1.91 ± 0.03 | 2.20 ± 0.04     | 2.03 ± 0.03 | 1.95 ± 0.03 | 1.79 ± 0.03 | 51.6 ± 1.4                  | 51.8 ± 1.4 | 51.6 ± 1.4 | 51.8 ± 1.3 |
|                    | 12   | 2.26 ± 0.03 | 2.04 ± 0.03 | 1.84 ± 0.03 | 0.98 ± 0.01 | 2.09 ± 0.03     | 1.95 ± 0.03 | 1.74 ± 0.03 | 0.89 ± 0.01 | 51.9 ± 1.4                  | 51.4 ± 1.4 | 52.4 ± 1.3 | 51.8 ± 1.1 |
|                    | 18   | 2.21 ± 0.03 | 1.98 ± 0.03 | 1.72 ± 0.03 | 0.63 ± 0.01 | 2.03 ± 0.03     | 1.87 ± 0.03 | 1.59 ± 0.03 | 0.53 ± 0.01 | 52.1 ± 1.4                  | 52.0 ± 1.4 | 54.3 ± 1.3 | 52.3 ± 1.0 |
|                    | 24   | 1.90 ± 0.03 | 1.67 ± 0.02 | 1.51 ± 0.02 | 0.31 ± 0.01 | 1.78 ± 0.03     | 1.62 ± 0.03 | 1.37 ± 0.02 | 0.23 ± 0.01 | 51.7 ± 1.3                  | 52.5 ± 1.3 | 57.1 ± 1.4 | 52.0 ± 0.9 |
| Bobek cones        | 0    | 2.45 ± 0.04 | 2.45 ± 0.04 | 2.45 ± 0.04 | 2.45 ± 0.04 | 2.33 ± 0.04     | 2.33 ± 0.04 | 2.33 ± 0.04 | 2.33 ± 0.04 | 51.3 ± 1.4                  | 51.3 ± 1.4 | 51.3 ± 1.4 | 51.3 ± 1.4 |
|                    | 6    | 2.16 ± 0.03 | 1.93 ± 0.03 | 1.72 ± 0.03 | 1.79 ± 0.03 | 2.12 ± 0.03     | 1.89 ± 0.03 | 1.71 ± 0.03 | 1.77 ± 0.03 | 50.5 ± 1.4                  | 50.5 ± 1.3 | 50.2 ± 1.3 | 50.3 ± 1.3 |
|                    | 12   | 2.00 ± 0.03 | 1.66 ± 0.02 | 1.57 ± 0.02 | 0.60 ± 0.01 | 1.96 ± 0.03     | 1.68 ± 0.03 | 1.52 ± 0.02 | 0.58 ± 0.01 | 50.6 ± 1.3                  | 49.7 ± 1.2 | 50.9 ± 1.2 | 50.6 ± 1.0 |
|                    | 18   | 1.93 ± 0.03 | 1.58 ± 0.02 | 1.29 ± 0.02 | 0.45 ± 0.01 | 1.88 ± 0.03     | 1.58 ± 0.03 | 1.30 ± 0.02 | 0.38 ± 0.01 | 50.7 ± 1.3                  | 50.0 ± 1.2 | 49.8 ± 1.1 | 53.7 ± 1.0 |
|                    | 24   | 1.75 ± 0.03 | 1.34 ± 0.02 | 1.04 ± 0.02 | 0.24 ± 0.01 | 1.75 ± 0.03     | 1.29 ± 0.02 | 1.01 ± 0.02 | 0.21 ± 0.01 | 50.0 ± 1.3                  | 50.8 ± 1.2 | 50.5 ± 1.1 | 53.7 ± 0.9 |
| Styrian Gold cones | 0    | 2.96 ± 0.04 | 2.96 ± 0.04 | 2.96 ± 0.04 | 2.96 ± 0.04 | 1.84 ± 0.03     | 1.84 ± 0.03 | 1.84 ± 0.03 | 1.84 ± 0.03 | 61.7 ± 1.7                  | 61.7 ± 1.7 | 61.7 ± 1.7 | 61.7 ± 1.7 |
|                    | 6    | 2.35 ± 0.03 | 2.09 ± 0.03 | 2.13 ± 0.03 | 1.81 ± 0.03 | 1.45 ± 0.02     | 1.37 ± 0.02 | 1.35 ± 0.02 | 1.15 ± 0.02 | 61.8 ± 1.6                  | 60.3 ± 1.5 | 61.1 ± 1.5 | 61.0 ± 1.5 |
|                    | 12   | 2.22 ± 0.03 | 1.82 ± 0.03 | 1.98 ± 0.03 | 0.80 ± 0.01 | 1.39 ± 0.02     | 1.16 ± 0.02 | 1.25 ± 0.02 | 0.51 ± 0.01 | 61.5 ± 1.6                  | 61.0 ± 1.5 | 61.3 ± 1.5 | 61.0 ± 1.2 |
|                    | 18   | 2.17 ± 0.03 | 1.75 ± 0.03 | 1.90 ± 0.03 | 0.64 ± 0.01 | 1.35 ± 0.02     | 1.13 ± 0.02 | 1.18 ± 0.02 | 0.39 ± 0.01 | 61.6 ± 1.6                  | 60.9 ± 1.4 | 61.7 ± 1.5 | 62.4 ± 1.2 |
|                    | 24   | 2.05 ± 0.03 | 1.61 ± 0.02 | 1.53 ± 0.02 | 0.39 ± 0.01 | 1.22 ± 0.02     | 1.07 ± 0.02 | 0.97 ± 0.02 | 0.20 ± 0.01 | 62.6 ± 1.6                  | 60.1 ± 1.4 | 61.2 ± 1.4 | 66.0 ± 1.1 |
| Styrian Wolf cones | 0    | 2.11 ± 0.03 | 2.11 ± 0.03 | 2.11 ± 0.03 | 2.11 ± 0.03 | 2.03 ± 0.03     | 2.03 ± 0.03 | 2.03 ± 0.03 | 2.03 ± 0.03 | 51.0 ± 1.4                  | 51.0 ± 1.4 | 51.0 ± 1.4 | 51.0 ± 1.4 |
|                    | 6    | 1.81 ± 0.03 | 1.64 ± 0.02 | 1.42 ± 0.02 | 1.11 ± 0.02 | 1.75 ± 0.03     | 1.56 ± 0.02 | 1.38 ± 0.02 | 1.03 ± 0.02 | 50.9 ± 1.3                  | 51.2 ± 1.3 | 50.9 ± 1.2 | 51.9 ± 1.1 |
|                    | 12   | 1.73 ± 0.03 | 1.44 ± 0.02 | 1.12 ± 0.02 | 0.39 ± 0.01 | 1.63 ± 0.03     | 1.29 ± 0.02 | 1.12 ± 0.02 | 0.35 ± 0.01 | 51.5 ± 1.3                  | 52.7 ± 1.2 | 49.9 ± 1.1 | 52.7 ± 0.9 |
|                    | 18   | 1.63 ± 0.02 | 1.28 ± 0.02 | 0.90 ± 0.01 | 0.21 ± 0.01 | 1.57 ± 0.03     | 1.27 ± 0.02 | 0.94 ± 0.02 | 0.18 ± 0.01 | 50.9 ± 1.2                  | 50.2 ± 1.1 | 49.0 ± 1.0 | 53.8 ± 0.9 |
|                    | 24   | 1.38 ± 0.02 | 1.17 ± 0.02 | 0.63 ± 0.01 | 0.15 ± 0.01 | 1.31 ± 0.02     | 1.09 ± 0.02 | 0.57 ± 0.01 | 0.11 ± 0.01 | 51.2 ± 1.2                  | 51.6 ± 1.1 | 52.3 ± 1.0 | 57.7 ± 0.9 |

Table S4: The content of co-lupulone, (n+ad)-lupulone and % of co-lupulone in beta-acids in hop pellets.

|                      | time | co-lupulone |             |             |             | (n+ad)-lupulone |             |             |             | % co-lupulone in beta-acids |            |            |            |
|----------------------|------|-------------|-------------|-------------|-------------|-----------------|-------------|-------------|-------------|-----------------------------|------------|------------|------------|
| Variety/Conditions   |      | A           | B           | C           | D           | A               | B           | C           | D           | A                           | B          | C          | D          |
| Celeia pellets       | 0    | 1.81 ± 0.03 | 1.81 ± 0.03 | 1.81 ± 0.03 | 1.81 ± 0.03 | 1.34 ± 0.02     | 1.34 ± 0.02 | 1.34 ± 0.02 | 1.34 ± 0.02 | 57.4 ± 1.4                  | 57.4 ± 1.4 | 57.4 ± 1.4 | 57.4 ± 1.4 |
|                      | 6    | 1.60 ± 0.02 | 1.55 ± 0.02 | 1.38 ± 0.02 | 1.40 ± 0.02 | 1.18 ± 0.02     | 1.13 ± 0.02 | 1.02 ± 0.02 | 1.04 ± 0.02 | 57.4 ± 1.3                  | 57.9 ± 1.3 | 57.4 ± 1.3 | 57.4 ± 1.3 |
|                      | 12   | 1.54 ± 0.02 | 1.48 ± 0.02 | 1.28 ± 0.02 | 1.04 ± 0.02 | 1.11 ± 0.02     | 1.02 ± 0.02 | 0.93 ± 0.01 | 0.61 ± 0.01 | 58.0 ± 1.3                  | 59.1 ± 1.3 | 58.1 ± 1.3 | 63.1 ± 1.3 |
|                      | 18   | 1.48 ± 0.02 | 1.42 ± 0.02 | 1.24 ± 0.02 | 1.00 ± 0.01 | 1.09 ± 0.02     | 0.99 ± 0.02 | 0.86 ± 0.01 | 0.53 ± 0.01 | 57.5 ± 1.3                  | 58.8 ± 1.3 | 59.2 ± 1.3 | 65.2 ± 1.3 |
|                      | 24   | 1.30 ± 0.02 | 1.35 ± 0.02 | 1.00 ± 0.01 | 0.59 ± 0.01 | 0.97 ± 0.02     | 0.9 ± 0.01  | 0.60 ± 0.01 | 0.23 ± 0.01 | 57.4 ± 1.3                  | 60.0 ± 1.3 | 62.5 ± 1.3 | 72.0 ± 1.3 |
| Auora pellets        | 0    | 2.48 ± 0.04 | 2.48 ± 0.04 | 2.48 ± 0.04 | 2.48 ± 0.04 | 2.24 ± 0.04     | 2.24 ± 0.04 | 2.24 ± 0.04 | 2.24 ± 0.04 | 52.6 ± 1.5                  | 52.6 ± 1.5 | 52.6 ± 1.5 | 52.6 ± 1.5 |
|                      | 6    | 2.35 ± 0.03 | 2.26 ± 0.03 | 2.14 ± 0.03 | 2.06 ± 0.03 | 2.15 ± 0.03     | 2.1 ± 0.03  | 1.97 ± 0.03 | 1.87 ± 0.03 | 52.2 ± 1.4                  | 51.8 ± 1.4 | 52.1 ± 1.4 | 52.4 ± 1.4 |
|                      | 12   | 2.27 ± 0.03 | 2.18 ± 0.03 | 2.03 ± 0.03 | 1.93 ± 0.03 | 2.02 ± 0.03     | 2.02 ± 0.03 | 1.84 ± 0.03 | 1.76 ± 0.03 | 52.9 ± 1.4                  | 51.8 ± 1.4 | 52.5 ± 1.4 | 52.2 ± 1.3 |
|                      | 18   | 2.15 ± 0.03 | 2.16 ± 0.03 | 1.98 ± 0.03 | 1.85 ± 0.03 | 1.94 ± 0.03     | 1.97 ± 0.03 | 1.79 ± 0.03 | 1.62 ± 0.03 | 52.5 ± 1.4                  | 52.3 ± 1.4 | 52.5 ± 1.4 | 53.3 ± 1.3 |
|                      | 24   | 1.90 ± 0.03 | 1.96 ± 0.03 | 1.81 ± 0.03 | 1.43 ± 0.02 | 1.79 ± 0.03     | 1.81 ± 0.03 | 1.57 ± 0.03 | 1.13 ± 0.02 | 51.5 ± 1.3                  | 52.0 ± 1.3 | 53.5 ± 1.3 | 55.9 ± 1.3 |
| Bobek pellets        | 0    | 2.39 ± 0.04 | 2.39 ± 0.04 | 2.39 ± 0.04 | 2.39 ± 0.04 | 2.56 ± 0.04     | 2.56 ± 0.04 | 2.56 ± 0.04 | 2.56 ± 0.04 | 52.6 ± 1.5                  | 48.2 ± 1.4 | 48.2 ± 1.4 | 48.2 ± 1.4 |
|                      | 6    | 2.16 ± 0.03 | 2.05 ± 0.03 | 1.97 ± 0.03 | 1.62 ± 0.02 | 2.39 ± 0.04     | 2.30 ± 0.04 | 2.18 ± 0.03 | 1.77 ± 0.03 | 47.5 ± 1.3                  | 47.1 ± 1.3 | 47.4 ± 1.3 | 47.8 ± 1.2 |
|                      | 12   | 2.11 ± 0.03 | 1.96 ± 0.03 | 1.86 ± 0.03 | 0.39 ± 0.01 | 2.27 ± 0.04     | 2.15 ± 0.03 | 2.03 ± 0.03 | 0.31 ± 0.01 | 48.2 ± 1.3                  | 47.8 ± 1.3 | 47.8 ± 1.3 | 55.6 ± 1.0 |
|                      | 18   | 2.02 ± 0.03 | 1.87 ± 0.03 | 1.83 ± 0.03 | 0.19 ± 0.01 | 2.16 ± 0.03     | 2.07 ± 0.03 | 2.01 ± 0.03 | 0.08 ± 0.01 | 48.4 ± 1.3                  | 47.4 ± 1.2 | 47.6 ± 1.2 | 70.8 ± 1.1 |
|                      | 24   | 1.86 ± 0.03 | 1.75 ± 0.03 | 1.73 ± 0.03 | 0.05 ± 0.01 | 1.90 ± 0.03     | 1.93 ± 0.03 | 1.92 ± 0.03 | 0.02 ± 0.01 | 49.4 ± 1.3                  | 47.6 ± 1.2 | 47.3 ± 1.2 | 71.4 ± 1.1 |
| Styrian Gold pellets | 0    | 1.40 ± 0.02 | 1.40 ± 0.02 | 1.40 ± 0.02 | 1.40 ± 0.02 | 1.14 ± 0.02     | 1.14 ± 0.02 | 1.14 ± 0.02 | 1.14 ± 0.02 | 55.0 ± 1.3                  | 55 ± 1.3   | 55.0 ± 1.3 | 55.0 ± 1.3 |
|                      | 6    | 1.11 ± 0.02 | 1.00 ± 0.01 | 1.02 ± 0.02 | 0.97 ± 0.01 | 0.98 ± 0.02     | 0.87 ± 0.01 | 0.93 ± 0.01 | 0.87 ± 0.01 | 53.1 ± 1.1                  | 53.4 ± 1.1 | 52.5 ± 1.1 | 52.6 ± 1.1 |
|                      | 12   | 1.05 ± 0.02 | 0.97 ± 0.01 | 0.97 ± 0.01 | 0.86 ± 0.01 | 0.92 ± 0.01     | 0.85 ± 0.01 | 0.86 ± 0.01 | 0.75 ± 0.01 | 53.1 ± 1.1                  | 53.3 ± 1.1 | 53.0 ± 1.1 | 53.2 ± 1.1 |
|                      | 18   | 1.02 ± 0.02 | 0.96 ± 0.01 | 0.95 ± 0.01 | 0.83 ± 0.01 | 0.91 ± 0.01     | 0.83 ± 0.01 | 0.84 ± 0.01 | 0.70 ± 0.01 | 53.0 ± 1.1                  | 53.7 ± 1.1 | 53.1 ± 1.1 | 54.3 ± 1.1 |
|                      | 24   | 0.92 ± 0.01 | 0.91 ± 0.01 | 0.89 ± 0.01 | 0.58 ± 0.01 | 0.8 ± 0.01      | 0.8 ± 0.01  | 0.81 ± 0.01 | 0.44 ± 0.01 | 53.5 ± 1.1                  | 53.2 ± 1.1 | 52.3 ± 1.1 | 57.0 ± 1.1 |
| Styrian Wolf pellets | 0    | 2.19 ± 0.03 | 2.19 ± 0.03 | 2.19 ± 0.03 | 2.19 ± 0.03 | 2.05 ± 0.03     | 2.05 ± 0.03 | 2.05 ± 0.03 | 2.05 ± 0.03 | 51.7 ± 1.4                  | 51.7 ± 1.4 | 51.7 ± 1.4 | 51.7 ± 1.4 |
|                      | 6    | 2.11 ± 0.03 | 2.02 ± 0.03 | 1.61 ± 0.02 | 1.28 ± 0.02 | 1.95 ± 0.03     | 1.91 ± 0.03 | 1.49 ± 0.02 | 1.15 ± 0.02 | 51.9 ± 1.4                  | 51.4 ± 1.3 | 51.9 ± 1.3 | 52.6 ± 1.2 |
|                      | 12   | 2.05 ± 0.03 | 1.95 ± 0.03 | 1.35 ± 0.02 | 0.66 ± 0.01 | 1.91 ± 0.03     | 1.8 ± 0.03  | 1.24 ± 0.02 | 0.53 ± 0.01 | 51.8 ± 1.4                  | 52.1 ± 1.3 | 52.1 ± 1.2 | 55.6 ± 1.1 |
|                      | 18   | 2.02 ± 0.03 | 1.88 ± 0.03 | 1.05 ± 0.02 | 0.44 ± 0.01 | 1.88 ± 0.03     | 1.75 ± 0.03 | 0.95 ± 0.02 | 0.34 ± 0.01 | 51.8 ± 1.4                  | 51.7 ± 1.3 | 52.5 ± 1.1 | 56.3 ± 1.0 |
|                      | 24   | 1.95 ± 0.03 | 1.82 ± 0.03 | 0.69 ± 0.01 | 0.18 ± 0.01 | 1.84 ± 0.03     | 1.69 ± 0.03 | 0.59 ± 0.01 | 0.10 ± 0.01 | 51.5 ± 1.3                  | 51.8 ± 1.3 | 53.8 ± 1.0 | 65.4 ± 1.0 |
